# Supplementary material for: The Transcriptomes of the Crucian Carp Complex (Carassius auratus) Provide Insights into the Distinction between Unisexual Triploids and Sexual Diploids
Source: PubMed Central journal article supplement (PMC4100101; doi:10.3390/ijms15069386), 2014-05-27
Supplement: ijms-15-09386-s001.pdf [file ijms-15-09386-s001.pdf]

## Supplementary Information

**Figure S1.** DNA contents of gibel carps and diploid crucian carps measured by flow cytometry using chicken (G1) as the reference. The *x*-axis shows DNA content, and the *y*-axis is cell number. **(A)** exhibits DNA contents for chicken (G1), diploid crucian carp (G2) and gibel carp (G3); **(B–K)** show DNA contents of ten diploid crucian carps (G2) using chicken DNA content (G1) as the reference; **(L–U)** display DNA contents of ten gibel carps (G2) and chicken (G1). The mean DNA content of gibel carp population is 1.5 times that of the diploid crucian carps.

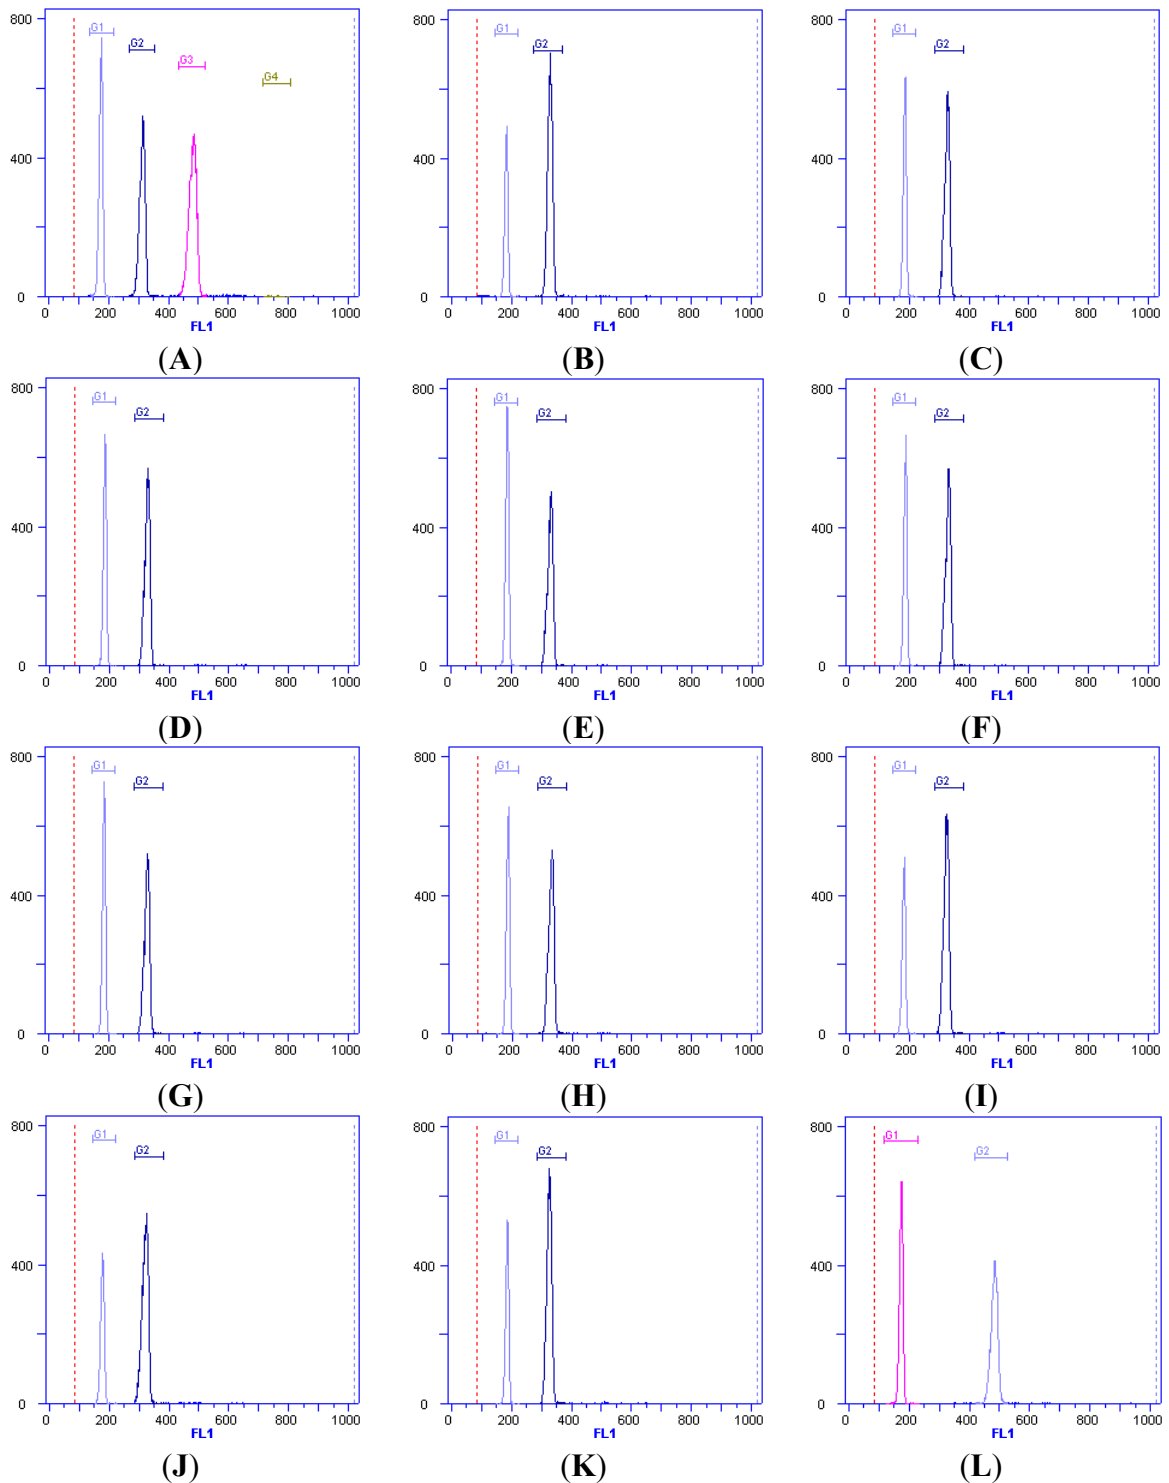

Figure S1. Cont.

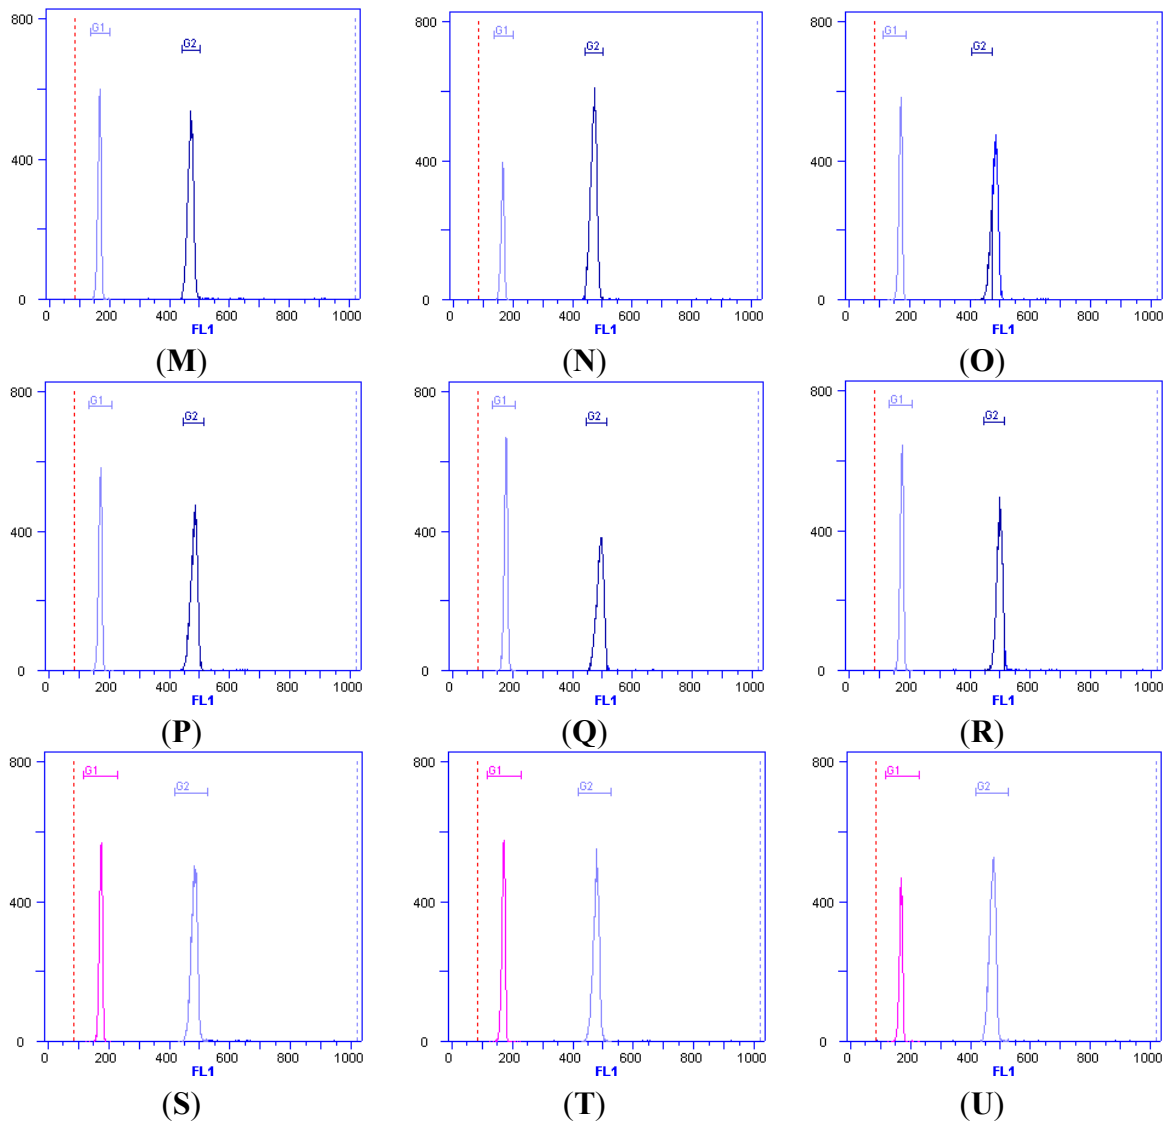

Figure S2. Saturation analysis for transcriptome coverage. Saturation curves for two species representing expected gene coverage rates. Curves were constructed for two fish.

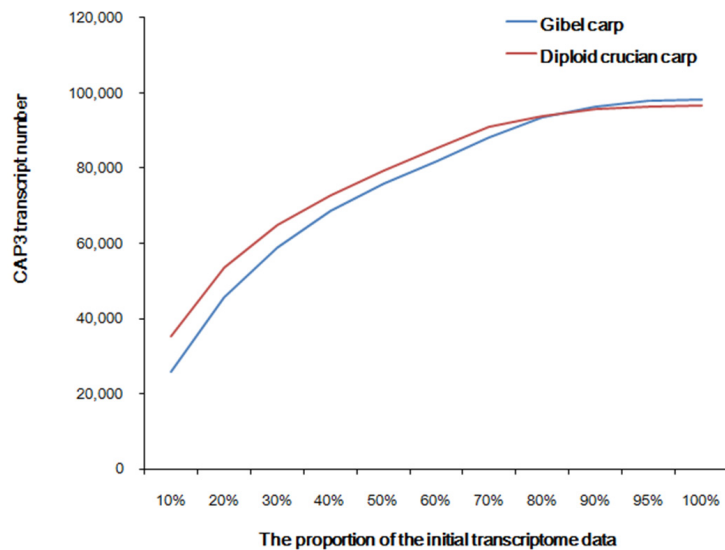

**Figure S3.** (A) 1–12: Gibel carp conserved genes; 13: common carp  $\beta$ -actin; M: DL2000 DNA marker; (B) 1–12: Diploid crucian carp conserved genes; 13: common carp  $\beta$ -actin; M: DL2000 DNA marker.

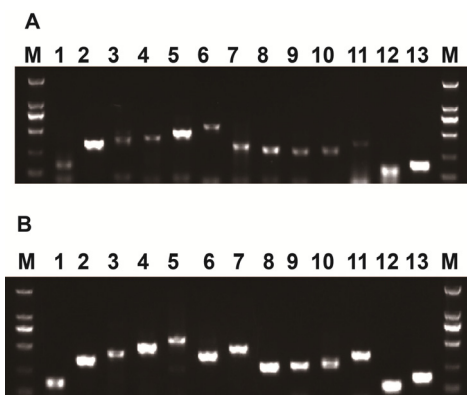

**Figure S4.** Gel electrophoresis with Bioanalyzer 2100. L: ladder; 1: pooled tissues of triploid gibel carp; 2: pooled tissues of diploid crucian carp; 3: gonad of triploid gibel carp; 4: gonad of diploid crucian carp.

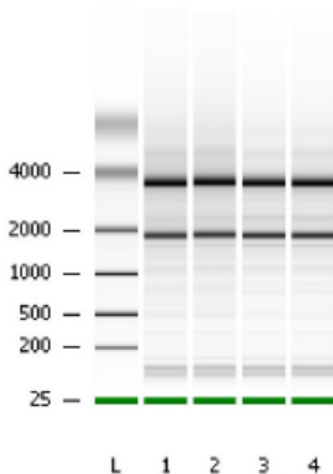

**Figure S5.** Amplification plots of beta-actin in the 1:10 dilution test. (A) 1:10 serial dilution series of cDNA from the pooled tissues of triploid gibel carp; (B) 1:10 serial dilution series of cDNA from the pooled tissues of diploid gibel carp; (C) 1:10 serial dilution series of cDNA from the gonad of triploid gibel carp; (D) 1:10 serial dilution series of cDNA from the gonad of diploid gibel carp.

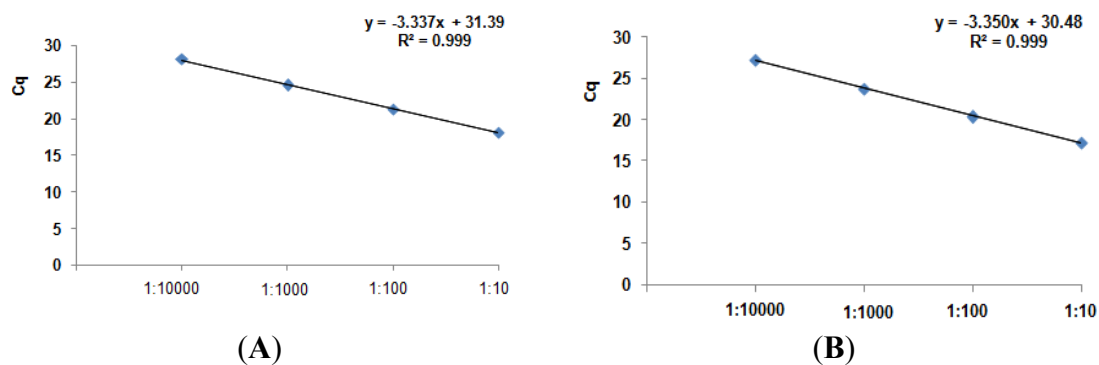

Figure S5. Cont.

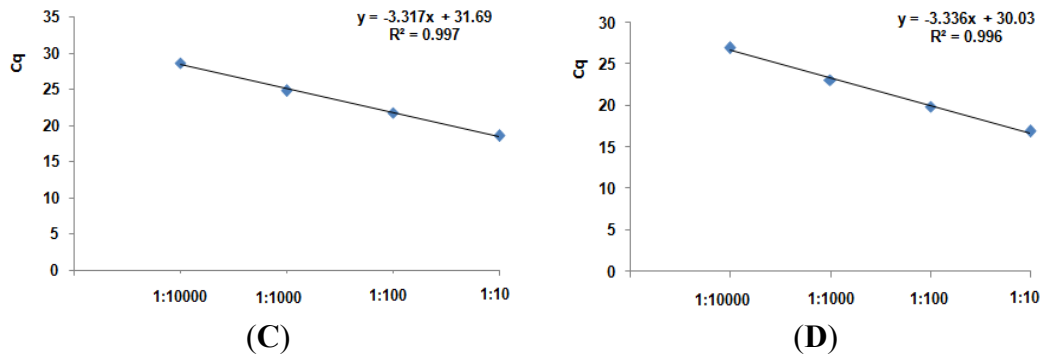

Table S1. Summary of microsatellites identified from the transcriptomes.

| Type                                  | Number            |                      |
|---------------------------------------|-------------------|----------------------|
|                                       | <i>Gibel Carp</i> | Diploid Crucian Carp |
| Di-nucleotide repeats                 | 2141              | 2229                 |
| Tri-nucleotide repeats                | 1641              | 1754                 |
| Tetra-nucleotide repeats              | 155               | 158                  |
| Penta-nucleotide repeats              | 8                 | 3                    |
| Hexa-nucleotide repeats               | 8                 | 9                    |
| Total number of identified SSRs       | 3953              | 4153                 |
| Number of transcripts containing SSRs | 3258              | 3382                 |

Table S2. The level of tri-allelic heterozygosity estimated by microsatellite genotyping in individuals.

| Loci           | <i>Gibel Carp</i> Transcript | Sample |   |                |   |   |   |   |   |   |    |
|----------------|------------------------------|--------|---|----------------|---|---|---|---|---|---|----|
|                |                              | 1      | 2 | 3              | 4 | 5 | 6 | 7 | 8 | 9 | 10 |
| 1 <sup>S</sup> | 000000377                    | 2 %    | 2 | 1 <sup>※</sup> | 2 | 2 | 2 | 2 | 2 | 3 | 2  |
| 2              | 000002772                    | 2      | 2 | 3 <sup>#</sup> | 2 | 2 | 2 | 2 | 1 | 3 | 2  |
| 3              | 000003185                    | 1      | 1 | 3              | 1 | 1 | 2 | 2 | 2 | 1 | 2  |
| 4              | 000003195                    | N &    | 1 | 2              | 3 | 3 | 2 | 3 | 2 | 2 | 3  |
| 5              | 000006001                    | 2      | 2 | 3              | 1 | 3 | 2 | 2 | 2 | 3 | 3  |
| 6              | 000003781                    | 1      | 1 | 1              | 1 | 1 | 1 | 1 | 1 | 1 | 1  |
| 7              | 000003916                    | 2      | 2 | 1              | 2 | 1 | 1 | 1 | 2 | 2 | 1  |
| 8              | 000003932                    | 1      | 1 | 1              | 1 | 1 | 1 | 1 | 1 | 1 | 1  |
| 9              | 000001091                    | 2      | 3 | 3              | 1 | 3 | 3 | 3 | 3 | 2 | N  |
| 10             | 000001234                    | 1      | 2 | 2              | 2 | 2 | 1 | 2 | 2 | 2 | 1  |
| 11             | 000001414                    | 1      | 2 | 2              | 3 | 3 | 3 | 2 | 3 | 3 | 2  |
| 12             | 000004045                    | N      | N | N              | 1 | 1 | N | N | N | 1 | N  |
| 13             | 000004497                    | 2      | 2 | 1              | 2 | 2 | 2 | 2 | 2 | 2 | 3  |
| 14             | 000005660                    | N      | 2 | 3              | 3 | 3 | 2 | 3 | 3 | N | N  |
| 15             | 000006377                    | 2      | 2 | 2              | 3 | N | 2 | 2 | 1 | 2 | 1  |
| 16             | 000006392                    | 2      | 1 | 2              | 2 | 2 | 2 | 2 | 3 | 2 | 2  |
| 17             | 000007745                    | 2      | 1 | N              | 1 | 1 | 1 | 1 | 2 | 3 | 2  |
| 18             | 000033229                    | 3      | 3 | 1              | 2 | 2 | N | 2 | 3 | N | N  |

※ 1 represents homozygous sites; % 2 represents di-allelic polymorphism; # 3 represents tri-allelic polymorphic sites; & N represents no amplification; <sup>S</sup> the information of the eighteen loci was showed in Table S4 (Supplementary Information).

**Table S3.** Specific primers to amplify the assembled transcripts.

| Loci | <i>Gibel Carp</i><br>Transcript | <i>Diploid Crucian</i><br><i>Carp</i> Transcript | Forward Primer           | Reverse Primer        |
|------|---------------------------------|--------------------------------------------------|--------------------------|-----------------------|
| 1    | 000006377                       | fed000000971                                     | AGATGCTTGAACCTGAGAACCCTG | AGGCAAGGCACTATAACAACG |
| 2    | 000014179                       | fed000005970                                     | ATTCAGAGCGAGGGAGC        | CCTGGAGCAAATAACAAC    |
| 3    | 000016617                       | fed0000064895                                    | ATAGTGGCACGTATAGGCA      | AACACCGAACACGAGAAT    |
| 4    | 000016230                       | fed000002177                                     | GGGTCAGAGTCAGTGGTGT      | GCTCCTCAGAGTGGTGCA    |
| 5    | 000000055                       | fed000012838                                     | ACAGCCCACAGCAGAGCA       | CACCAGCAGCCTGAAGAT    |
| 6    | 000037964                       | fed000052155                                     | TACTTCATGCCATGCTCC       | AACCTCGACGATCTCAAA    |
| 7    | 000003195                       | fed000017309                                     | TGCCACATTATATGCGGAC      | GGAGGAGAATGGGATACAGG  |
| 8    | 000003633                       | fed000011424                                     | CCATGTTGGTTGTGAGGCAT     | TGGGCTTGTGACAGATACG   |
| 9    | 000003916                       | fed000049725                                     | GAGCTATGGGACAAACTG       | TCTGACTTTGCGGTTGGATG  |
| 10   | 000001234                       | fed000012474                                     | CCGCTAATGAACATCGTG       | TCCTCCGTCTGTAATCCC    |
| 11   | 000004497                       | fed000051313                                     | CGATTCCCTGATGAACAAGC     | CATTCTCAGACAAGGCGACA  |
| 12   | 000005660                       | fed000060066                                     | AGAGCAGAGCCAGTGGAGCA     | AGTTCAGGGTCGGCGGAGTA  |
| 13 * | M24113.1                        | M24113.1                                         | TGCAAAGCCGGATTGCTGG      | AGTTGGTGACAATACCGTGC  |

\* common carp beta-actin.

**Table S4.** Specific genotyping primers in gibel carps to estimate the level of tri-allelic polymorphism.

| Loci | <i>Gibel Carp</i> Transcript | Forward Primer           | Reverse Primer         |
|------|------------------------------|--------------------------|------------------------|
| 1    | 00000377                     | CCCACCCTCAGAATGTTT       | CTTCTCCATTTCACTGCGTC   |
| 2    | 000002772                    | GCTGATTGGCTCTGGTCTGT     | TCCCAGGGCTTCTGATGTT    |
| 3    | 000003185                    | TCTAGGTCTACAGGGAATGG     | AGACGGTAGATGAACTCCCT   |
| 4    | 000003195                    | TGCCACATTATATGCGGAC      | GGAGGAGAATGGGATACAGG   |
| 5    | 000006001                    | GCGTTGGGAATCAGAAGAG      | AATCCGAACACGAGTCCACG   |
| 6    | 000003781                    | CCTGAGGCAGCATGTGATT      | GTACTCCGTCTCATCCGCAT   |
| 7    | 000003916                    | GAGCTATGGGACAAACTG       | TCTGACTTTGCGGTTGGATG   |
| 8    | 000003932                    | ACCACAGCCCAGCACATTCT     | TCAGCCGTAACGCAACCT     |
| 9    | 000001091                    | ACCCTCGAGCTGGATTAT       | CGCACACGCACATTTAGTCA   |
| 10   | 000001234                    | CCGCTAATGAACATCGTG       | TCCTCCGTCTGTAATCCC     |
| 11   | 000001414                    | GACTCGCAGCAGTTGGTT       | CATTGGGATGGAGGAAGA     |
| 12   | 000004045                    | TTGAGCACAGAGGCTGGTTC     | GGGCTGCTACTGAAGACATACA |
| 13   | 000004497                    | CGATTCCCTGATGAACAAGC     | CATTCTCAGACAAGGCGACA   |
| 14   | 000005660                    | AGAGCAGAGCCAGTGGAGCA     | AGTTCAGGGTCGGCGGAGTA   |
| 15   | 000006377                    | AGATGCTTGAACCTGAGAACCCTG | AGGCAAGGCACTATAACAACG  |
| 16   | 000006392                    | ACTGGATGGAGTGGGTGCTT     | GGTTTGTGGTGTCAAAGGGT   |
| 17   | 000007745                    | TAACCGTGCACCCGTGATA      | AATATCGCCTTCAGCCCACA   |
| 18   | 000033229                    | GTTACAGCGGAAATCAAGC      | CCAGCAGAGCATTCCATACG   |

**Table S5.** Purity Ratios (*A260/A280*) of four RNA samples.

| Sample                                 | <i>A260/A280</i> |
|----------------------------------------|------------------|
| pooled tissues of triploid gibel carp  | 2.010            |
| pooled tissues of diploid crucian carp | 2.128            |
| gonad of triploid gibel carp           | 2.039            |
| gonad of diploid crucian carp          | 2.079            |

**Table S6.** RIN values of four RNA samples.

| Sample                                 | RIN |
|----------------------------------------|-----|
| pooled tissues of triploid gibel carp  | 7.8 |
| pooled tissues of diploid crucian carp | 7.8 |
| gonad of triploid gibel carp           | 8   |
| gonad of diploid crucian carp          | 8   |

**Table S7.** Specific RT-qPCR primers of twenty DEGs to validate their expression differences.

| Function                       | Gene Symbol     | Forward Primer       | Reverse Primer        |
|--------------------------------|-----------------|----------------------|-----------------------|
| Immune response                | <i>lect2l</i>   | GGACGACCGCAGAGAAGATA | GCGGTTACTTGAGTTCAC    |
|                                | <i>cbn14</i>    | TAACCCTCCCAAGCAAGACA | AGTAGGTGTCCACTGAAGGT  |
|                                | <i>c5</i>       | TGCCCTTGTTTTTCATGTGG | TGGTTCGTGGAGAGCAGATT  |
|                                | <i>c7</i>       | ATGTCCTGGAGAACAGCCA  | TCAGGGTCTCACAGCTTTT   |
|                                | <i>vtnb</i>     | ACGGAGAAAGAAGACCAGGG | GTCATCCGGGTCATAGCTCA  |
|                                | <i>tesca</i>    | CGCAACTTTTCTGGGACGAA | TAGTCACTGTAGAGCTGCCG  |
|                                | <i>c8b</i>      | CTTTGGCGTTTTCTGCTCCT | GTCCTTCTTCAGACCACCCA  |
| Junction proteins              | <i>cx32.3</i>   | GGCAGTCCCCATCTCTCAT  | TGGGTTAGATAGCTGCCGAG  |
|                                | <i>sid4</i>     | GCTTCTCTCTGCTTTCCTGC | AGTGATGGTCAGGACAGCTC  |
|                                | <i>itga6b</i>   | CTCGTTGGCATGACTGACTG | CAGCTTGTTCCGGTTTCTCCC |
| Transferases                   | <i>vtna</i>     | CTTTGCCATTCTGCTCACA  | CTCAGCCCATCGGTCATAGT  |
|                                | <i>tat</i>      | CACACGGATTGGATGGGTTG | GCCATCAGCGTGTGTGTGTA  |
|                                | <i>cetp</i>     | AGTCAAGTCATGCCAGCTCT | CTCCTCCATCTCAGTGGGTC  |
| Binding proteins               | <i>fabp11a</i>  | ATCCCAGGTCTGTTTCTGCA | ACCTGATCGTGTGTGTGGAT  |
|                                | <i>rbp2b</i>    | AGATTGCAGCCCACCTTACT | CCCAGGTCACCAGAGTCTTT  |
| Ubiquitin related proteins     | <i>ube3a</i>    | AACTCTACATTGGGCGACA  | GAAACGGCCTCTGGTTCATC  |
| Transporters                   | <i>Tnp1</i>     | TCACCTCGCAGTCTTCATCA | GCTCTGAATCGACCCCTCAA  |
|                                | <i>TMEM87A</i>  | AGAAGGAGGGTTGCAGTGAA | TTGGCAGGTGGATGATTTGC  |
|                                | <i>accn2</i>    | TCCGTAGCGTGTGAAGATCA | CACTTGGTAGAGGAGAGCGT  |
| Signaling Proteins             | <i>IQGAP1</i>   | TCGAACAGCTTCATCACTGC | GAAATCGAGGATCTGCAGCC  |
|                                | <i>srp54</i>    | TTTGCCAAACCAACAACCCT | GGGCGGAAGAAGATGGTTTT  |
|                                | <i>Pcsk6</i>    | ATCCCACCACCTCTCCTTTG | GACCTGCGTTCTGAATGTG   |
|                                | <i>Map4k4</i>   | ATATAAGCGACGGAGGTGGG | ATGCAGTGGATGTGGACTCA  |
|                                | <i>smarcb1a</i> | CCAGTCTGGCCTGTAGTCAA | ACGGTCATCCCAAGCTTTTG  |
| Fish-egg lectin-like precursor | <i>fel</i>      | ATGTGAGCTTTGACCTGGGA | GTCACCTTGAGGCTTCGGTC  |
